# Supplementary material for: Improvement of genome assembly completeness and identification of novel full-length protein-coding genes by RNA-seq in the giant panda genome
Source: PubMed Central journal article supplement (PMC4676012; doi:10.1038/srep18019), 2015-12-11
Supplement: srep18019-s1.pdf [file srep18019-s1.pdf]

# **Improvement of genome assembly completeness and identification of novel full-length protein-coding genes by RNA-seq in the giant panda genome**

Meili Chen<sup>1#</sup>, Yibo Hu<sup>2#</sup>, Jingxing Liu<sup>1</sup>, Qi Wu<sup>2</sup>, Chenglin Zhang<sup>3</sup>, Jun Yu<sup>1</sup>, Jingfa Xiao<sup>1\*</sup>, Fuwen Wei<sup>2\*</sup>, Jiayan Wu<sup>1\*</sup>

\* Corresponding author.

E-mail address: xiaojingfa@big.ac.cn (JF XIAO); weifw@ioz.ac.cn (FW WEI);

wujy@big.ac.cn (JY WU).

## Supplementary Information

Table S1. Read preparation and mapping results.

| Tissue          | Raw pair reads | High quality reads | Mappable reads | Exon <sup>1</sup> | Exon-junction | Intron     | Intergenic <sup>2</sup> | Non-gene Scaffold <sup>3</sup> |
|-----------------|----------------|--------------------|----------------|-------------------|---------------|------------|-------------------------|--------------------------------|
| Colon           | 88,516,298     | 84,917,252         | 8,472,092      | 4,146,655         | 616,132       | 1,152,047  | 2,463,892               | 93,276                         |
| Liver           | 84,511,904     | 78,130,306         | 20,414,561     | 11,259,695        | 1,044,070     | 1,237,322  | 6,091,458               | 5,441,991                      |
| Pallium         | 78,207,108     | 73,621,091         | 61,686,127     | 20,393,249        | 3,845,224     | 7,580,264  | 25,002,204              | 4,865,186                      |
| Stomach         | 86,509,228     | 81,091,816         | 67,258,738     | 28,851,664        | 5,899,847     | 3,420,672  | 21,847,876              | 7,238,679                      |
| Ovary           | 83,640,730     | 79,008,729         | 63,073,897     | 18,346,012        | 3,661,561     | 16,446,828 | 22,638,419              | 1,981,077                      |
| Tongue          | 86,918,468     | 81,412,632         | 48,462,420     | 18,400,923        | 3,916,459     | 6,425,447  | 18,397,039              | 1,322,552                      |
| Pituitary gland | 87,458,546     | 80,425,690         | 65,781,666     | 23,943,886        | 5,594,655     | 4,010,804  | 30,333,761              | 1,898,560                      |
| Small intestine | 69,050,518     | 66,546,946         | 57,506,869     | 24,070,896        | 4,249,016     | 6,274,928  | 19,829,359              | 3,082,670                      |
| Testis          | 83,061,730     | 79,015,217         | 66,933,906     | 21,201,891        | 4,418,796     | 6,721,688  | 21,887,396              | 12,704,135                     |
| Skin 1          | 80,227,692     | 76,143,710         | 61,373,611     | 20,917,794        | 4,511,015     | 8,900,915  | 24,120,662              | 2,923,225                      |
| Skin 2          | 51,759,916     | 49,252,181         | 8,195,677      | 3,420,297         | 611,570       | 770,642    | 2,896,709               | 496,459                        |
| Skeletal muscle | 23,620,806     | 21,544,871         | 15,902,435     | 7,462,834         | 1,283,788     | 1,302,394  | 4,470,683               | 1,382,736                      |

1. Reads fall into exon regions including pure exon regions, gene boundaries, and exon-junction.

2. Reads fall into intergenic regions including gene upstream 5,000bp, gene downstream 5,000 bp, and other intergenic regions.

3. Non-gene scaffold meant scaffolds that were not covered by any known gene models.

Table S2. Trinity-assembled transcripts and alignment results.

| Tissue          | Transcripts | Transcribed<br>loci | Transcripts     |                       |           |
|-----------------|-------------|---------------------|-----------------|-----------------------|-----------|
|                 |             |                     | One<br>scaffold | Multiple<br>scaffolds | Unaligned |
| Colon           | 26,313      | 18,946              | 15,934          | 10,330                | 49        |
| Liver           | 26,512      | 21,082              | 17,551          | 8,909                 | 52        |
| Pallium         | 81,430      | 68,919              | 72,836          | 7,919                 | 675       |
| Stomach         | 41,258      | 38,421              | 36,621          | 4,403                 | 234       |
| Ovary           | 134,622     | 105,490             | 121,600         | 10,166                | 2,856     |
| Tongue          | 48,598      | 41,466              | 41,047          | 7,262                 | 289       |
| Pituitary gland | 44,748      | 39,648              | 41,513          | 2,817                 | 418       |
| Small intestine | 45,197      | 41,587              | 39,140          | 5,907                 | 150       |
| Testis          | 60,843      | 54,813              | 53,327          | 7,224                 | 292       |
| Skin 1          | 71,675      | 59,270              | 65,351          | 5,633                 | 691       |
| Skin 2          | 42,029      | 36,214              | 31,718          | 10,065                | 246       |
| Skeletal muscle | 33,014      | 29,952              | 29,679          | 3,096                 | 239       |

Table S3. The summary statistics of the original genome assembly and our improved genome assembly.

|                          | <b>Contig count</b> | <b>Contig size (bp)</b> | <b>Contig N50 (bp)</b> | <b>Contig N90 (bp)</b> | <b>Gaps count</b> |
|--------------------------|---------------------|-------------------------|------------------------|------------------------|-------------------|
| Original genome assembly | 200,593             | 2,245,312,831           | 39,886                 | 9,848                  | 119,126           |
| Improved genome assembly | 197,637             | 2,246,903,867           | 41,190                 | 10,081                 | 116,170           |

Table S4. The comparison results for mapping to the reference of original genome and improved genome.

|                 | Raw read pairs | Mappable pairs        |                         |                                           | Total mappable pairs | Unmappable pairs |
|-----------------|----------------|-----------------------|-------------------------|-------------------------------------------|----------------------|------------------|
|                 |                | Unique mappable pairs | Multiple mappable pairs | Disconcordant mappable pairs <sup>1</sup> |                      |                  |
| Original genome | 77,377,467     | 65,380,585            | 4,507,682               | 27,601                                    | 69,915,868           | 7,461,599        |
| Improved genome | 77,377,467     | 65,364,092            | 4,528,196               | 27,579                                    | 69,919,867           | 7,457,600        |

1. Disconcordant mappable pair meant disconcordant alignment that two reads in a pair were unique mapping, but did not satisfy specified filtering parameters (-I, -X, --fr/--rf/--ff).

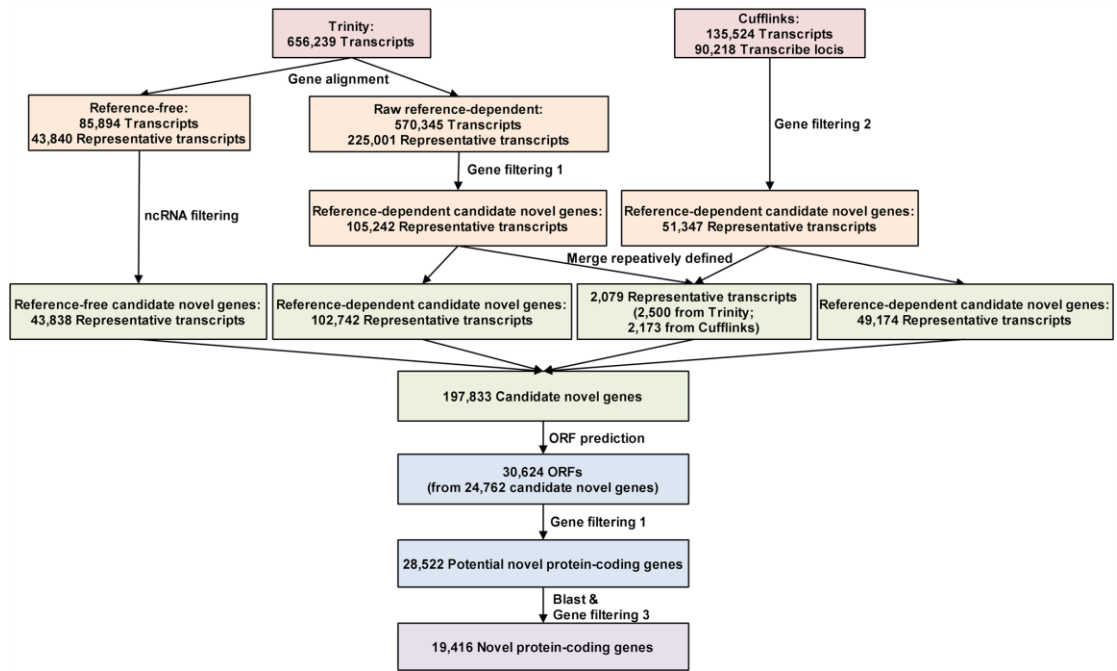

**Figure S1. The pipeline for systematic identification of candidate novel protein-coding genes.**

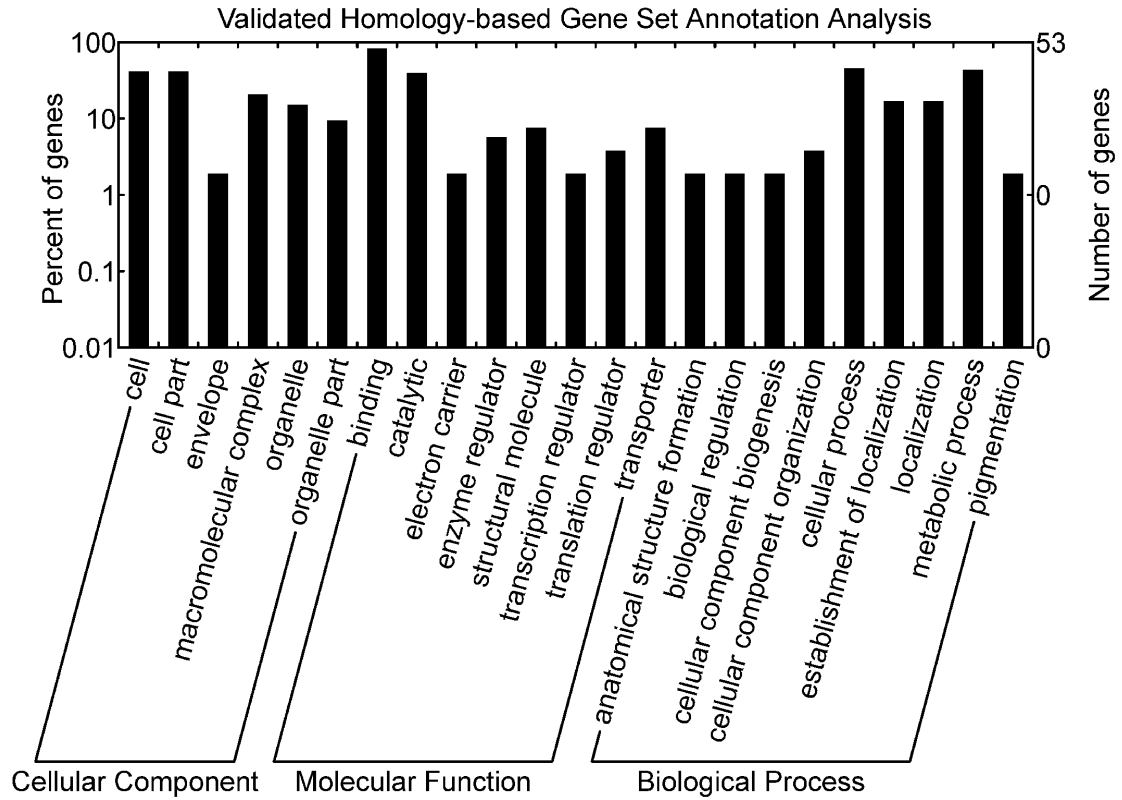

**Figure S2. GO functional annotation for homology-based novel genes validated by proteome.**
